# Supplementary material
Source: Elsevier journal article supplement (https://comptes-rendus.academie-sciences.fr/geoscience/article/10.1016/j.crte.2010.10.004/file/attach/mmc4.pdf)
Supplement: mmc4 [file mmc4.pdf]

Table S1.

Statistical parameters of  $\delta^{13}\text{C}$  and  $\delta^{18}\text{O}$  in all three wells through Permo-Triassic interval.

Tableau S1.

Paramètres statistiques de  $\delta^{13}\text{C}$  et  $\delta^{18}\text{O}$  dans les trois puits de l'intervalle Permo-Trias.

|         | <b>OFA_1</b> | <b>OFA_2</b>                    | <b>OFA_3</b> |
|---------|--------------|---------------------------------|--------------|
|         |              | $\delta^{13}\text{C} \text{ ‰}$ |              |
| Mean    | 2.66         | 3.85                            | 1.87         |
| Minimum | -0.95        | -0.61                           | -0.82        |
| Maximum | 6.89         | 7.24                            | 4.98         |
| Count   | 163          | 137                             | 185          |
|         |              | $\delta^{18}\text{O} \text{ ‰}$ |              |
| Mean    | -2.82        | -3.54                           | -2.62        |
| Minimum | -6.27        | -9.41                           | -6.46        |
| Maximum | 3.26         | 1.53                            | 4.01         |
| Count   | 163          | 137                             | 185          |
